# Supplementary material
Source: PubMed Central journal article supplement (PMC8675879)
Supplement: NIHMS1760082-supplement-1.pdf [file NIHMS1760082-supplement-1.pdf]

## Appendix

### A. Factors associated with receipt of RT dose $\geq 80$ Gy (n=65) vs. $< 80$ Gy (n=122) in FIGO stage IIIB cervical cancer in Botswana.

| Variable                                                     | Total Dose $\geq 80$ Gy (n=65)<br>No. Patients (%) | Total Dose $< 80$ Gy (n=122)<br>No. Patients (%) | P value  |
|--------------------------------------------------------------|----------------------------------------------------|--------------------------------------------------|----------|
| <b>Weight (kg)<sup>a</sup></b>                               |                                                    |                                                  |          |
| $\geq 60$                                                    | 33 (59)                                            | 41 (41)                                          | 0.04     |
| $< 60$                                                       | 23 (41)                                            | 58 (59)                                          |          |
| <b>BMI (kg/m<sup>2</sup>)<sup>a</sup></b>                    |                                                    |                                                  |          |
| $\leq 20$                                                    | 39 (72)                                            | 62 (70)                                          | 0.75     |
| $> 20$                                                       | 15 (28)                                            | 27 (30)                                          |          |
| <b>Age (years)</b>                                           |                                                    |                                                  |          |
| $\geq 50$ years                                              | 31 (48)                                            | 58 (47.5)                                        | 0.98     |
| $< 50$ years                                                 | 34 (52)                                            | 64 (52.5)                                        |          |
| <b>TTT<sup>b</sup></b>                                       |                                                    |                                                  |          |
| $> 3$ Months                                                 | 31 (60)                                            | 59 (65)                                          | 0.53     |
| $\leq 3$ Months                                              | 21 (40)                                            | 32 (35)                                          |          |
| <b>RT Course Length<sup>a</sup></b>                          |                                                    |                                                  |          |
| $\geq 7$ weeks                                               | 40 (61.5)                                          | 40 (33)                                          | $< 0.01$ |
| $< 7$ weeks                                                  | 25 (38.5)                                          | 81 (67)                                          |          |
| <b>Creatinine (<math>\mu\text{mol/L}</math>)<sup>a</sup></b> |                                                    |                                                  |          |
| $> 90$                                                       | 6 (10)                                             | 25 (21)                                          | 0.05     |
| $\leq 90$                                                    | 56 (90)                                            | 92 (79)                                          |          |
| <b>KPS</b>                                                   |                                                    |                                                  |          |
| 40-80                                                        | 18 (28)                                            | 36 (30)                                          | 0.77     |
| 90-100                                                       | 47 (72)                                            | 85 (70)                                          |          |
| <b>HIV Status</b>                                            |                                                    |                                                  |          |
| HIV-seropositive                                             | 43 (66)                                            | 75 (61.5)                                        | 0.53     |
| HIV-seronegative                                             | 22 (34)                                            | 47 (38.5)                                        |          |
| <b>Brachytherapy<sup>a</sup></b>                             |                                                    |                                                  |          |
| Yes                                                          | 64 (98.5)                                          | 56 (46)                                          | $< 0.01$ |
| No                                                           | 1 (1.5)                                            | 66 (54)                                          |          |
| <b>Chemotherapy</b>                                          |                                                    |                                                  |          |
| Yes                                                          | 43 (66)                                            | 47 (38.5)                                        | $< 0.01$ |
| No                                                           | 22 (34)                                            | 75 (61.5)                                        |          |
| <b>Treatment Response<sup>c</sup></b>                        |                                                    |                                                  |          |
| Complete                                                     | 36 (63)                                            | 44 (44)                                          | 0.02     |
| Non-Complete                                                 | 21 (37)                                            | 56 (56)                                          |          |
| <b>EBRT Boost<sup>a</sup></b>                                |                                                    |                                                  |          |
| Yes                                                          | 18 (28)                                            | 40 (33)                                          | 0.47     |
| No                                                           | 47 (72)                                            | 82 (67)                                          |          |
| <b>Hemoglobin (g/dL)<sup>a</sup></b>                         |                                                    |                                                  |          |
| $< 12$ g/dL                                                  | 48 (80)                                            | 91 (81)                                          | 0.84     |
| $\geq 12$ g/dL                                               | 12 (20)                                            | 21 (19)                                          |          |
| <b>Treatment Year</b>                                        |                                                    |                                                  |          |
| 2013-2015                                                    | 19 (29)                                            | 54 (44)                                          | 0.05     |
| 2016-2018                                                    | 46 (71)                                            | 68 (56)                                          |          |

Abbreviations: RT, radiation therapy; BMI, body mass index; TTT, time to treatment; KPS, Karnofsky Performance Score; HIV, human immunodeficiency virus; EBRT, external beam radiation therapy.

<sup>a</sup> Data is incomplete due to individual missing patient data.

<sup>b</sup> TTT is defined as time from pathological defined as the time from biopsy to treatment initiation.

<sup>c</sup> Treatment response is defined as clinically apparent tumor regression on exam.

**B. Factors associated with receipt of Chemotherapy (n=90) vs. No Chemotherapy (n=97) in FIGO stage IIIB cervical cancer in Botswana.**

| <b>Variable</b>                           | <b>Chemotherapy (n=90)</b><br>No. Patients (%) | <b>None (n=97)</b><br>No. Patients (%) | <b>P value</b> |
|-------------------------------------------|------------------------------------------------|----------------------------------------|----------------|
| <b>BMI (kg/m<sup>2</sup>)<sup>a</sup></b> |                                                |                                        |                |
| ≤20                                       | 59 (78)                                        | 42 (63)                                | 0.05           |
| >20                                       | 17 (22)                                        | 25 (37)                                |                |
| <b>Weight (kg)<sup>a</sup></b>            |                                                |                                        |                |
| ≥60                                       | 43 (53)                                        | 31 (42)                                | 0.16           |
| <60                                       | 38 (47)                                        | 43 (58)                                |                |
| <b>Age (years)</b>                        |                                                |                                        |                |
| ≥50 years                                 | 39 (43)                                        | 50 (51.5)                              | 0.26           |
| <50 years                                 | 51 (57)                                        | 47 (48.5)                              |                |
| <b>TTT<sup>b</sup></b>                    |                                                |                                        |                |
| >3 Months                                 | 27 (51)                                        | 63 (70)                                | 0.02           |
| ≤3 Months                                 | 26 (49)                                        | 27 (30)                                |                |
| <b>RT Course Length<sup>a</sup></b>       |                                                |                                        |                |
| ≥7 weeks                                  | 47 (53)                                        | 33 (34)                                | 0.01           |
| <7 weeks                                  | 42 (47)                                        | 64 (66)                                |                |
| <b>Creatinine (μmol/L)<sup>a</sup></b>    |                                                |                                        |                |
| >90                                       | 4 (5)                                          | 27 (28)                                | <0.01          |
| ≤90                                       | 80 (95)                                        | 68 (72)                                |                |
| <b>KPS</b>                                |                                                |                                        |                |
| 40-80                                     | 23 (26)                                        | 31 (32)                                | 0.31           |
| 90-100                                    | 67 (74)                                        | 65 (68)                                |                |
| <b>Tuberculosis</b>                       |                                                |                                        |                |
| Yes                                       | 8 (9)                                          | 9 (9)                                  | 0.93           |
| No                                        | 82 (91)                                        | 88 (91)                                |                |
| <b>HIV Status</b>                         |                                                |                                        |                |
| Positive                                  | 58 (64)                                        | 60 (62)                                | 0.71           |
| Negative                                  | 32 (36)                                        | 37 (38)                                |                |
| <b>Brachytherapy<sup>a</sup></b>          |                                                |                                        |                |
| Yes                                       | 77 (86)                                        | 43 (44)                                | <0.01          |
| No                                        | 13 (14)                                        | 54 (56)                                |                |
| <b>Treatment Response<sup>c</sup></b>     |                                                |                                        |                |
| Complete                                  | 45 (58)                                        | 35 (44)                                | 0.07           |
| Non-Complete                              | 32 (42)                                        | 45 (56)                                |                |
| <b>EBRT Boost<sup>a</sup></b>             |                                                |                                        |                |
| Yes                                       | 23 (26)                                        | 35 (36)                                | 0.12           |
| No                                        | 67 (74)                                        | 62 (64)                                |                |
| <b>Hemoglobin (g/dL)<sup>a</sup></b>      |                                                |                                        |                |
| <12 g/dL                                  | 57 (69.5)                                      | 82 (91)                                | <0.01          |
| ≥12 g/dL                                  | 25 (30.5)                                      | 8 (9)                                  |                |
| <b>Treatment Year</b>                     |                                                |                                        |                |
| 2013-2015                                 | 42 (47)                                        | 31 (32)                                | 0.04           |
| 2016-2018                                 | 48 (53)                                        | 66 (68)                                |                |

Abbreviations: BMI, body mass index; RT, radiation therapy; TTT, time to treatment; KPS, Karnofsky Performance Score; HIV, human immunodeficiency virus; EBRT, external beam radiation therapy.

<sup>a</sup> Data is incomplete due to individual missing patient data.

<sup>b</sup> TTT is defined as time from pathological defined as the time from biopsy to treatment initiation.

<sup>c</sup> Treatment response is defined as clinically apparent tumor regression on exam.

**C.** Survival outcomes by receipt of chemotherapy for patients receiving adequate RT (total EQD2  $\geq 80$  Gy): CRT (n=43) versus RT alone (n=22). Survival outcomes were similar with or without concurrent chemotherapy: 2-year OS was  $61.7 \pm 7.6\%$  months versus  $57.1 \pm 7.3\%$  (p=0.766)

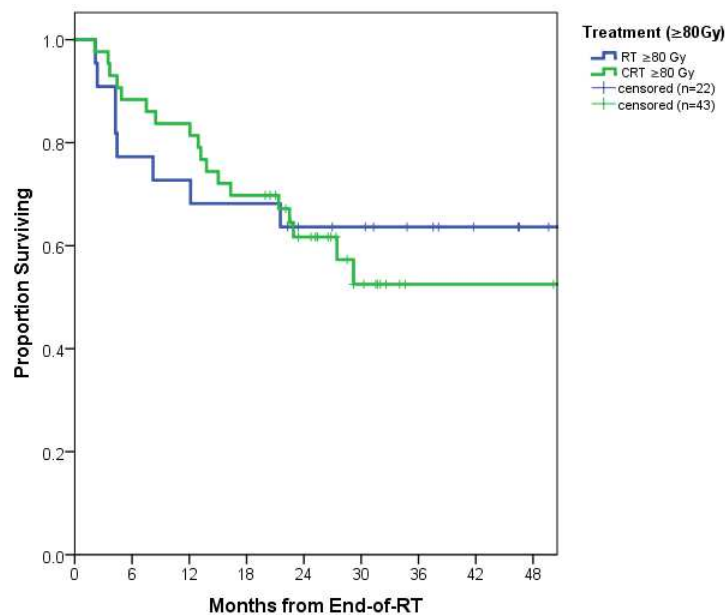

Abbreviations: RT, radiation therapy; EQD2, dose equivalent of 2 Gy per fraction; CRT, chemoradiation therapy.

**D.** Survival outcomes by receipt of chemotherapy for patients receiving “inadequate RT” (Total EQD2  $< 80$  Gy): Chemo/RT (n=47) versus RT alone (n=75). Two-year OS was significantly improved with the addition of chemotherapy:  $51.9 \pm 14.3\%$  versus  $34.3 \pm 5.5\%$  (p =  $< 0.01$ )

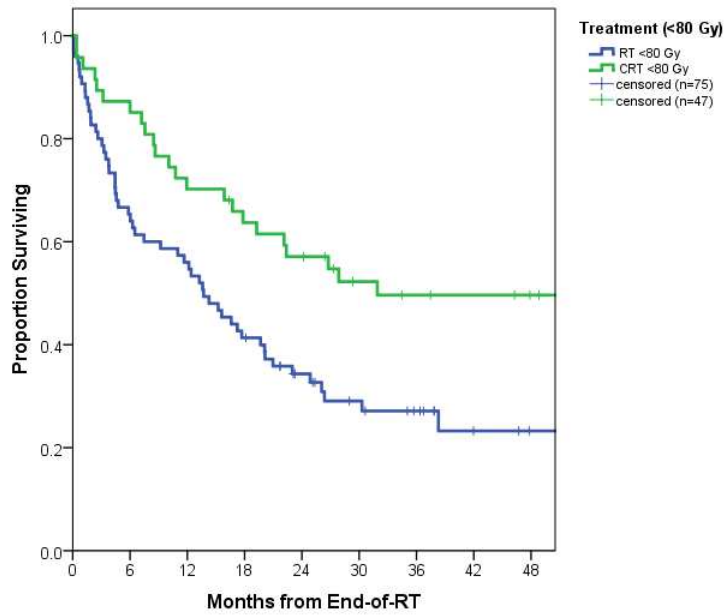

Abbreviations: RT, radiation therapy; EQD2, dose equivalent of 2 Gy per fraction; CRT, chemoradiation therapy.
